# Supplementary material for: Redundant roles of photoreceptors and cytokinins in regulating photosynthetic acclimation to canopy density
Source: PubMed Central journal article supplement — J Exp Bot. 2009 Feb 24;60(4):1179–90. doi: 10.1093/jxb/ern364 (PMC2657547; doi:10.1093/jxb/ern364), 2009-02-24
Supplement: ern364_1.pdf [file ern364_1.pdf]

## Supplemental Material

Redundant roles of photoreceptors and cytokinins in regulating photosynthetic acclimation to canopy density

A. Boonman, E. Prinsen, L.A.C.J. Voeselek, and T.L. Pons

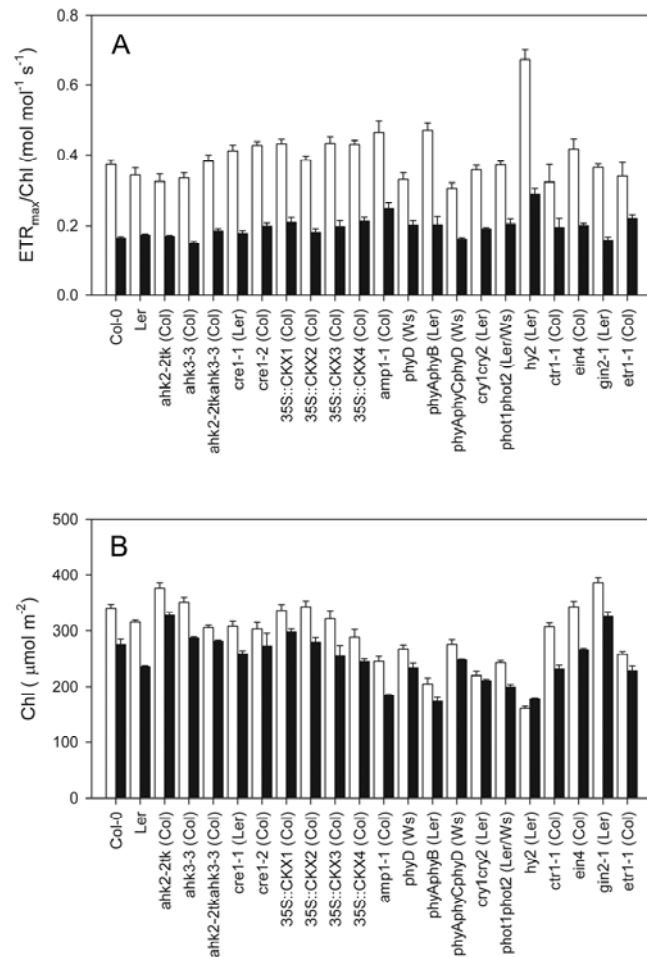

**Figure S1.** ETR<sub>max</sub> per unit chlorophyll (A) and chlorophyll level per unit area (B) of Arabidopsis mutants and transgenics. One attached leaf was shaded (PPFD ~ 14 μmol m<sup>-2</sup> s<sup>-1</sup>; low light, LL) for 6 d and compared to a leaf on a different plant that remained in the light (PPFD ~ 200 μmol m<sup>-2</sup> s<sup>-1</sup>; high light, HL). Shading induced significant decreases in ETR<sub>max</sub>/Chl in all genotypes tested ( $P < 0.05$ ; student's t-test; except for *ctr1-1*:  $P = 0.056$ ). Data are means ± SE,  $n = 6$ .
